# Supplementary material for: Clustering of Dietary Patterns and Lifestyles Among Spanish Children in the EsNuPI Study
Source: PubMed Central journal article supplement (PMC7551863; doi:10.3390/nu12092536), 2020-08-21
Supplement: nutrients-12-02536-s001.pdf [file nutrients-12-02536-s001.pdf]

**Table 1.** Principal component analysis for SRS and AMS cohorts in the EsNuPi study.

| Variables 1 to <3 years old (SRS)       | Component                    |                                |                         |
|-----------------------------------------|------------------------------|--------------------------------|-------------------------|
|                                         | Palatable energy-dense foods | Diverse plant and animal foods | Mediterranean-like diet |
| Other dairy products (grams per day)    | 0.775                        |                                |                         |
| Sugar and sweets (grams per day)        | 0.774                        | 0.295                          |                         |
| Bakery and pastry (grams per day)       | 0.746                        |                                |                         |
| Ready to cook (grams per day)           | 0.746                        |                                |                         |
| Appetizers (grams per day)              | 0.663                        |                                |                         |
| Beverages (grams per day)               | 0.559                        |                                | 0.269                   |
| Sauces and condiments (grams per day)   | 0.502                        |                                | 0.298                   |
| Oils and fats (grams per day)           | 0.471                        | 0.359                          | 0.206                   |
| Eggs (grams per day)                    | 0.328                        |                                | 0.255                   |
| Cereals (grams per day)                 |                              | 0.797                          | 0.354                   |
| Vegetables (grams per day)              |                              | 0.758                          | 0.274                   |
| Milk and dairy products (grams per day) |                              | 0.697                          | -0.341                  |
| Cereal-based baby foods (grams per day) | -0.310                       | 0.598                          | -0.258                  |
| Meat and meat products (grams per day)  | 0.289                        | 0.435                          | 0.367                   |
| Nuts (grams per day)                    | 0.219                        |                                | 0.704                   |
| Fruit (grams per day)                   |                              | 0.492                          | 0.674                   |
| Legumes (grams per day)                 |                              |                                | 0.640                   |
| Fish and shellfish (grams per day)      |                              |                                | 0.556                   |
| Variance (%)                            | 28.017                       | 13.359                         | 9.891                   |
| Cumulative proportion of variance (%)   | 28.017                       | 41.375                         | 51.266                  |

| Variables 3 to <6 years old (SRS)     | Component                    |                         |             |
|---------------------------------------|------------------------------|-------------------------|-------------|
|                                       | Palatable energy-dense foods | Mediterranean-like diet | Component 3 |
| Ready to cook (grams per day)         | 0.703                        | 0.287                   |             |
| Sugar and sweets (grams per day)      | 0.693                        |                         |             |
| Bakery and pastry (grams per day)     | 0.692                        |                         |             |
| Oils and fats (grams per day)         | 0.524                        |                         | 0.314       |
| Other dairy products (grams per day)  | 0.485                        |                         |             |
| Sauces and condiments (grams per day) | 0.430                        |                         |             |
| Appetizers (grams per day)            | 0.424                        |                         |             |
| Beverages (grams per day)             | 0.356                        |                         | 0.316       |
| Fish and shellfish (grams per day)    |                              | 0.687                   |             |
| Legumes (grams per day)               |                              | 0.660                   |             |

|                                         |        |        |        |
|-----------------------------------------|--------|--------|--------|
| Nuts (grams per day)                    |        | 0.613  | -0.255 |
| Meat and meat products (grams per day)  | 0.446  | 0.599  |        |
| Vegetables (grams per day)              |        | 0.514  | 0.335  |
| Eggs (grams per day)                    |        | 0.303  |        |
| Cereals (grams per day)                 | 0.275  | 0.234  | 0.717  |
| Cereal-based baby foods (grams per day) |        |        | 0.616  |
| Milk and dairy products (grams per day) |        |        | 0.501  |
| Fruit (grams per day)                   |        | 0.462  | 0.494  |
| Variance (%)                            | 21.272 | 9.799  | 8.474  |
| Cumulative proportion of variance (%)   | 21.272 | 31.071 | 39.545 |

| Variables 6 to <10 years old (SRS)      | Component                    |                         |             |
|-----------------------------------------|------------------------------|-------------------------|-------------|
|                                         | Palatable energy-dense foods | Mediterranean-like diet | Component 3 |
| Cereals (grams per day)                 | 0.700                        |                         |             |
| Ready to cook (grams per day)           | 0.664                        |                         | 0.259       |
| Sauces and condiments (grams per day)   | 0.660                        |                         |             |
| Sugar and sweets (grams per day)        | 0.657                        |                         |             |
| Oils and fats (grams per day)           | 0.608                        |                         |             |
| Meat and meat products (grams per day)  | 0.535                        | 0.395                   | 0.348       |
| Appetizers (grams per day)              | 0.455                        |                         |             |
| Eggs (grams per day)                    | 0.407                        |                         |             |
| Vegetables (grams per day)              |                              | 0.686                   |             |
| Nuts (grams per day)                    |                              | 0.661                   |             |
| Fish and shellfish (grams per day)      | 0.206                        | 0.588                   |             |
| Legumes (grams per day)                 |                              | 0.527                   |             |
| Beverages (grams per day)               |                              |                         | 0.611       |
| Milk and dairy products (grams per day) |                              |                         | 0.560       |
| Fruit (grams per day)                   |                              | 0.487                   | 0.524       |
| Other dairy products (grams per day)    |                              |                         | 0.524       |
| Bakery and pastry (grams per day)       | 0.349                        |                         | 0.478       |
| Cereal-based baby foods (grams per day) |                              |                         | 0.329       |
| Variance (%)                            | 21.803                       | 9.149                   | 7.915       |
| Cumulative proportion of variance (%)   | 21.803                       | 30.952                  | 38.866      |

| Variables 1 to <3 years old (AMS)       | Component               |             |                              |
|-----------------------------------------|-------------------------|-------------|------------------------------|
|                                         | Mediterranean-like diet | Component 2 | Palatable energy-dense foods |
| Cereals (grams per day)                 | 0.900                   |             |                              |
| Vegetables (grams per day)              | 0.867                   |             |                              |
| Fruit (grams per day)                   | 0.659                   |             |                              |
| Cereal-based baby foods (grams per day) | 0.621                   |             | -0.345                       |
| Oils and fats (grams per day)           | 0.573                   |             | 0.552                        |
| Milk and dairy products (grams per day) | 0.536                   | 0.202       | -0.315                       |
| Legumes (grams per day)                 | 0.521                   |             | 0.225                        |
| Other dairy products (grams per day)    |                         | 0.800       |                              |
| Bakery and pastry (grams per day)       |                         | 0.699       | 0.233                        |
| Meat and meat products (grams per day)  | 0.545                   | 0.659       |                              |
| Ready to cook (grams per day)           |                         | 0.608       | 0.575                        |
| Eggs (grams per day)                    |                         | 0.573       |                              |
| Fish and shellfish (grams per day)      |                         | 0.414       | 0.206                        |
| Beverages (grams per day)               |                         | 0.397       | 0.400                        |
| Appetizers (grams per day)              |                         |             | 0.695                        |
| Sugar and sweets (grams per day)        | 0.229                   | 0.277       | 0.633                        |
| Sauces and condiments (grams per day)   |                         | 0.388       | 0.564                        |
| Nuts (grams per day)                    |                         |             |                              |
| Variance (%)                            | 28.327                  | 15.365      | 6.871                        |
| Cumulative proportion of variance (%)   | 28.327                  | 43.691      | 50.562                       |

| Variables 3 to <6 years old (AMS)       | Component               |                              |             |
|-----------------------------------------|-------------------------|------------------------------|-------------|
|                                         | Mediterranean-like diet | Palatable energy-dense foods | Component 3 |
| Legumes (g/day)                         | 0.644                   |                              | 0.214       |
| Fish and shellfish (g/day)              | 0.636                   |                              |             |
| Vegetables (g/day)                      | 0.559                   |                              | 0.556       |
| Meat and meat products (g/day)          | 0.557                   | 0.289                        | 0.252       |
| Nuts (g/day)                            | 0.553                   |                              |             |
| Ready to cook/eat (g/day)               | 0.548                   | 0.532                        | -0.227      |
| Oils and fats (g/day)                   | 0.3                     | 0.244                        |             |
| Sauces and condiments (g/day)           |                         | 0.671                        |             |
| Appetizers (g/day)                      | 0.339                   | 0.661                        |             |
| Beverages (g/day)                       | -0.261                  | 0.654                        | 0.258       |
| Sugars and sweets (g/day)               | 0.288                   | 0.544                        |             |
| Eggs (g/day)                            |                         | 0.442                        |             |
| Other dairy products (g/day)            | 0.26                    | 0.397                        |             |
| Bakery and pastry (g/day)               | 0.249                   | 0.375                        |             |
| Fruits (g/day)                          |                         |                              | 0.72        |
| Cereals (g/day)                         | 0.363                   |                              | 0.65        |
| Milk and dairy products (g/day)         |                         |                              | 0.588       |
| Cereal-based baby foods (grams per day) |                         | -0.227                       | 0.533       |
| Variance (%)                            | 22.611                  | 12.115                       | 7.573       |
| Cumulative proportion of variance (%)   | 22.611                  | 34.727                       | 42.3        |

| Variables 6 to <10 years old (AMS)      | Component                    |                         |             |
|-----------------------------------------|------------------------------|-------------------------|-------------|
|                                         | Palatable energy-dense foods | Mediterranean-like diet | Component 3 |
| Bakery and pastry (grams per day)       | 0.772                        |                         |             |
| Beverages (grams per day)               | 0.735                        | 0.231                   |             |
| Ready to cook (grams per day)           | 0.630                        |                         | 0.473       |
| Oils and fats (grams per day)           | 0.619                        |                         |             |
| Sugar and sweets (grams per day)        | 0.531                        |                         | 0.492       |
| Other dairy products (grams per day)    | 0.362                        |                         |             |
| Fruit (grams per day)                   |                              | 0.712                   |             |
| Vegetables (grams per day)              |                              | 0.706                   |             |
| Cereals (grams per day)                 |                              | 0.616                   |             |
| Milk and dairy products (grams per day) | 0.238                        | 0.485                   |             |
| Legumes (grams per day)                 |                              | 0.245                   |             |
| Sauces and condiments (grams per day)   |                              |                         | 0.765       |
| Meat and meat products (grams per day)  |                              | 0.313                   | 0.562       |
| Appetizers (grams per day)              |                              |                         | 0.461       |
| Fish and shellfish (grams per day)      |                              | 0.394                   | 0.424       |
| Nuts (grams per day)                    |                              | 0.322                   | 0.379       |
| Eggs (grams per day)                    |                              |                         |             |
| Cereal-based baby foods (grams per day) |                              |                         |             |
| Variance (%)                            | 17.685                       | 11.303                  | 8.575       |
| Cumulative proportion of variance (%)   | 17.685                       | 28.989                  | 37.564      |

SRS, Spanish Reference Cohort, AMS, Adapted Milk Consumers Cohort. Principal component analysis (PCA) was used to maximize the information gained for the predominant food groups from diet. This mathematical model calculates new variables (principal components) that account for the variability in the food groups data and enables the study of covariances or correlations between variables (e.g., milk and dairy products, cereals, vegetables, meat and meat products, etc.). The combination of food groups variables with the greatest amount of variability is the first principal component. The subsequent components (second and third principal components) describe the maximum amount of remaining variability. Factor loading was used to interpret the factor structure. Loadings are equivalent to Pearson correlation coefficients, and a higher loading indicates a stronger relation between a factor and an observed variable. Strong loading was defined as a value  $\geq 0.6$ , and marginal loading as a value from 0.2 to 0.4.
